# Supplementary material for: Multifunctional applications enabled by tunable multi-emission and ultra-broadband VIS-NIR luminescence via energy transfer in Sn 2+ /Mn 2+ -doped lead-free Zn-based metal halides
Source: Royal Society of Chemistry journal article supplement (doi:10.1039/d4mh01821d), 2025-01-01
Supplement: d4mh01821d1.pdf [file d4mh01821d1.pdf]

## Supporting Information

### Multifunctional Applications Enabled by Tunable Multi-Emission and Ultra-Broadband Vis-NIR Luminescence via Energy Transfer in Sn<sup>2+</sup>/Mn<sup>2+</sup>-Doped Lead-Free Zn- Based Metal Halides

*Yongqi Yang*<sup>a</sup>, *Bao Ke*<sup>a,\*</sup>, *Chengzhi Yang*<sup>a</sup>, *Yang Xue*<sup>a</sup>, *Kaihuang Huang*<sup>a</sup>, *Xintong Lu*<sup>b</sup>, *Bingsuo Zou*<sup>a,\*</sup>

<sup>a</sup> School of Physical Science and Technology, School of Chemistry and Chemical Engineering, State Key Laboratory of Featured Metal Materials and Life-cycle Safety for Composite Structures, and School of Resources, Environment and Materials, Guangxi University, Nanning 530004, China.

<sup>b</sup> Faculty of Education, The University of Hong Kong, Hong Kong 999077, China

\* Address correspondence to E-mail: [abner@gxu.edu.cn](mailto:abner@gxu.edu.cn); [zoubs@gxu.edu.cn](mailto:zoubs@gxu.edu.cn).

**Table S1.** Single crystal X-ray diffraction data of (TPA)<sub>2</sub>ZnBr<sub>4</sub>.

|                               |                                                                   |
|-------------------------------|-------------------------------------------------------------------|
| <b>Empirical formula</b>      | (TPA) <sub>2</sub> ZnBr <sub>4</sub>                              |
| <b>Chemical formula</b>       | C <sub>24</sub> H <sub>56</sub> Br <sub>4</sub> N <sub>2</sub> Zn |
| <b>Formula weight</b>         | 757.72                                                            |
| <b>Temperature (K)</b>        | 296(2)                                                            |
| <b>Crystal system</b>         | monoclinic                                                        |
| <b>Space group</b>            | C2/c                                                              |
| <b>a (Å)</b>                  | 33.145(5)                                                         |
| <b>b (Å)</b>                  | 14.234(3)                                                         |
| <b>c (Å)</b>                  | 15.081(2)                                                         |
| <b>α (deg)</b>                | 90                                                                |
| <b>β (deg)</b>                | 110.207(5)                                                        |
| <b>γ (deg)</b>                | 90                                                                |
| <b>Volume (Å<sup>3</sup>)</b> | 6677.1(17)                                                        |
| <b>Z</b>                      | 8                                                                 |

**Table S2.** PL decay parameters of (TPA)<sub>2</sub>ZnBr<sub>4</sub>:Sn<sup>2+</sup>/Mn<sup>2+</sup> monitored at 510 nm emission wavelength with different doping concentration of Sn<sup>2+</sup>.

| Sn <sup>2+</sup> content | τ <sub>1</sub> (μs) | τ <sub>2</sub> (μs) | τ <sub>ave</sub> (μs) |
|--------------------------|---------------------|---------------------|-----------------------|
| 0%                       | 0                   | 364.9               | 361.2                 |
| 1%                       | 4.58                | 357.0               | 356.9                 |
| 5%                       | 4.68                | 351.8               | 351.8                 |
| 10%                      | 4.75                | 347.0               | 346.9                 |
| 15%                      | 4.81                | 336.8               | 336.2                 |
| 20%                      | 4.85                | 320.8               | 320.0                 |
| 25%                      | 5.54                | 275.4               | 270.0                 |

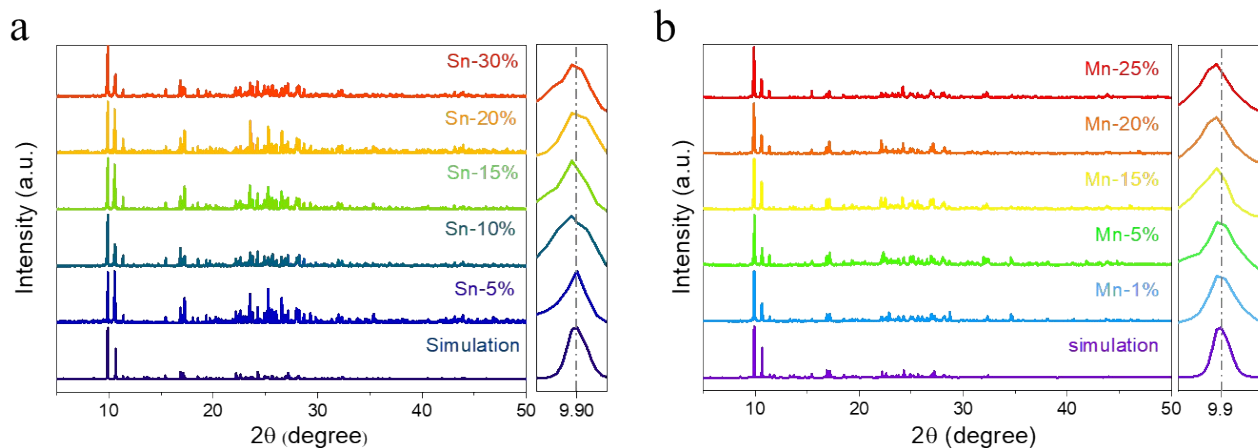

**Fig. S1.** PXRD patterns of (TPA)<sub>2</sub>ZnBr<sub>4</sub>:x%Sn<sup>2+</sup> (a) and (TPA)<sub>2</sub>ZnBr<sub>4</sub>:x%Mn<sup>2+</sup> (b).

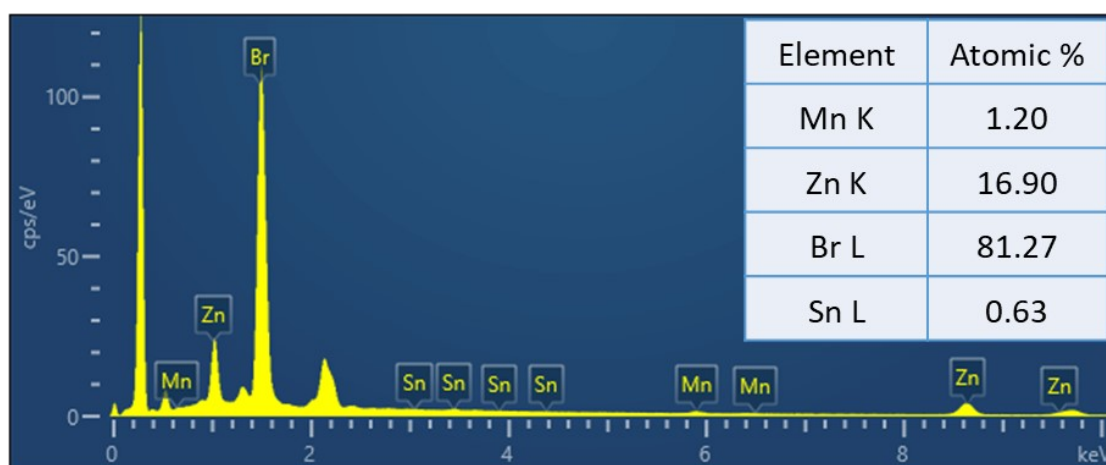

**Fig. S2.** EDS spectrum and element proportion in the (TPA)<sub>2</sub>ZnBr<sub>4</sub>:5%Sn<sup>2+</sup>/20%Mn<sup>2+</sup> SCs, the inset table shows the element ratio.

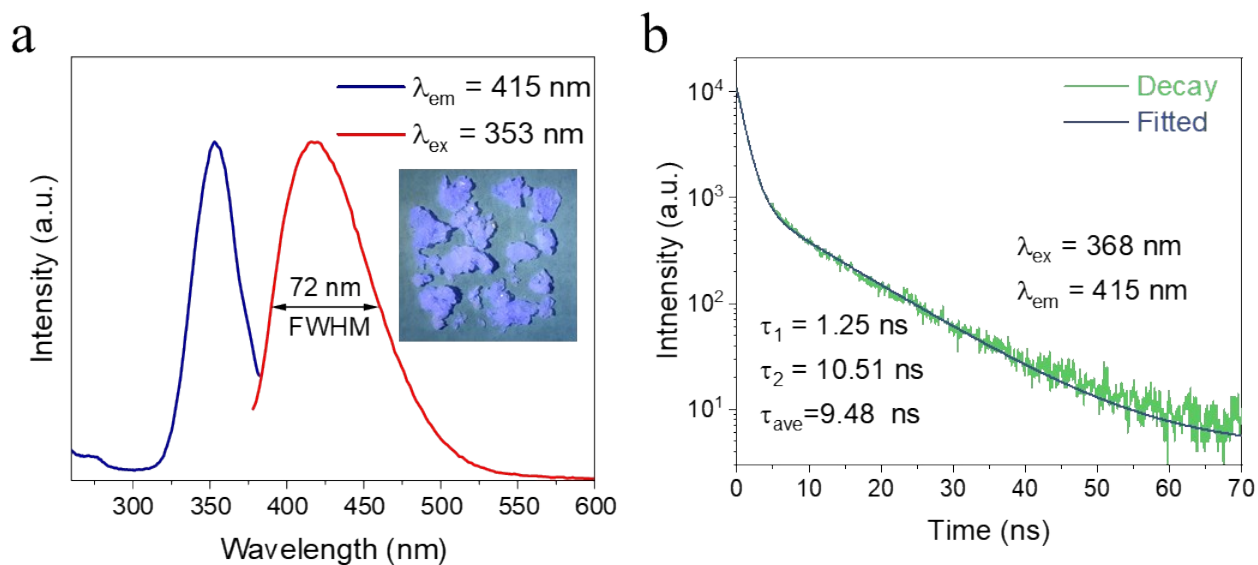

**Fig. S3.** (a) Normalized PLE and PL spectra of  $(\text{TPA})_2\text{ZnBr}_4$  ( $\lambda_{\text{ex}} = 353$  nm,  $\lambda_{\text{em}} = 415$  nm). Inset image shows the  $(\text{TPA})_2\text{ZnBr}_4$  at 365 nm excitation. (b) PL decay curves of  $(\text{TPA})_2\text{ZnBr}_4$  ( $\lambda_{\text{ex}} = 368$  nm,  $\lambda_{\text{em}} = 415$  nm).

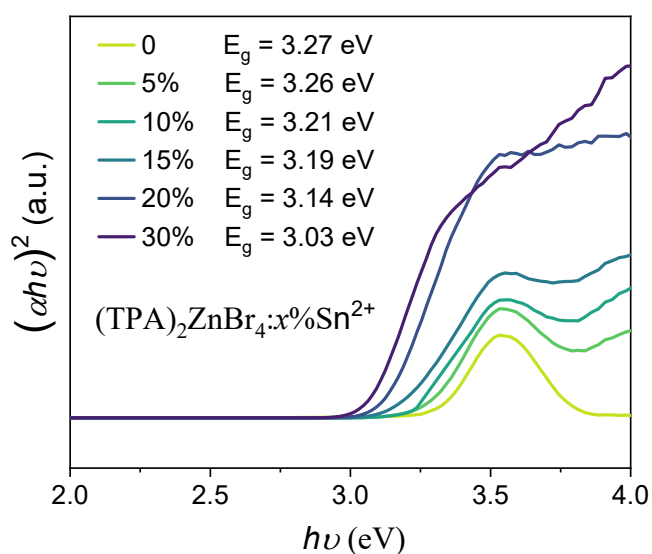

**Fig. S4.** Tauc plots of the diffuse reflectance spectra of recrystallized  $(\text{TPA})_2\text{ZnBr}_4:x\%\text{Sn}^{2+}$ . The optical bandgaps ( $E_g$ ) of the as-prepared samples were calculated by using the Kubelka–Munk theory<sup>1</sup>:

$$[F(R_\infty)hv]^n = A(hv - E_g)$$

where  $R$  is the reflectance coefficient (%),  $h\nu$  represents the photon energy, and  $A$  represents the absorption constant.

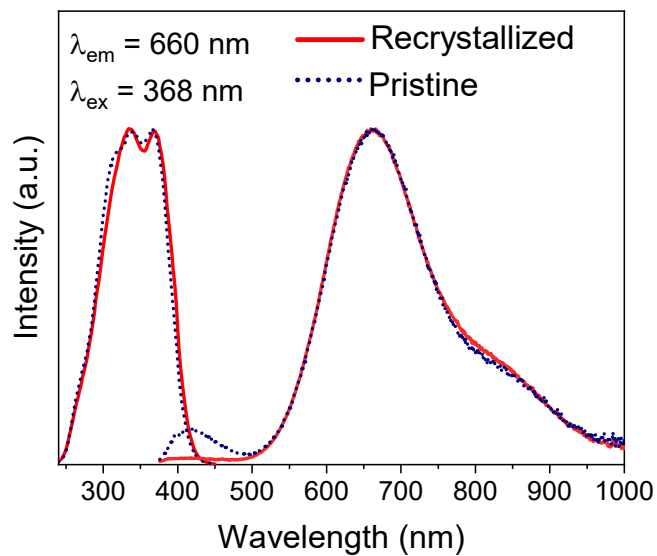

**Fig. S5.** Normalized PL and PLE spectra of pristine (blue) and recrystallized  $(\text{TPA})_2\text{ZnBr}_4:20\%\text{Sn}^{2+}$  (red).

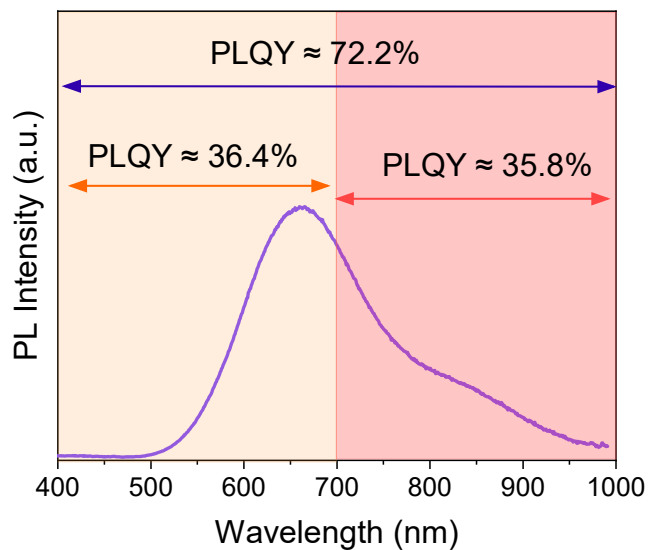

**Fig. S6.** PL spectra of recrystallized  $(\text{TPA})_2\text{ZnBr}_4:20\%\text{Sn}^{2+}$  SCs under the excitation of 368 nm. The PLQY of NIR (700–1000 nm) region, and PLQY of the complete broadband spectral region.

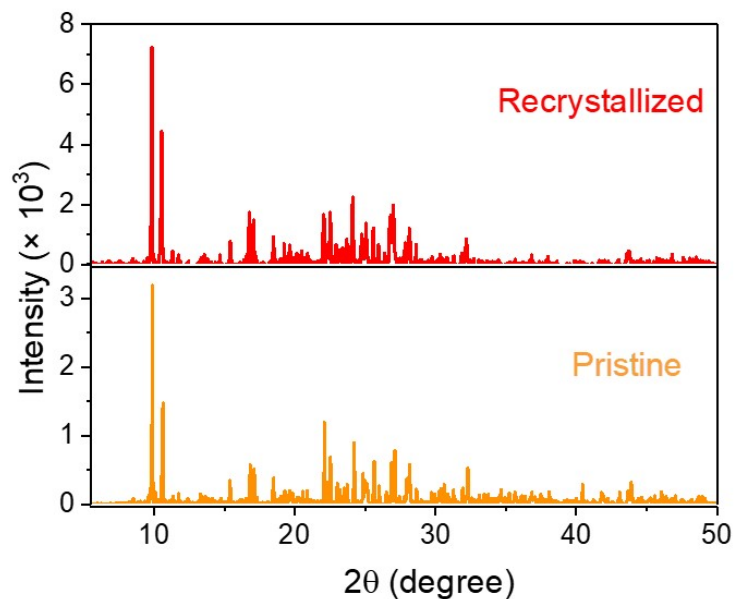

**Fig. S7.** XRD patterns of the pristine and Recrystallized  $(\text{TPA})_2\text{ZnBr}_4:\text{Sn}^{2+}$ .

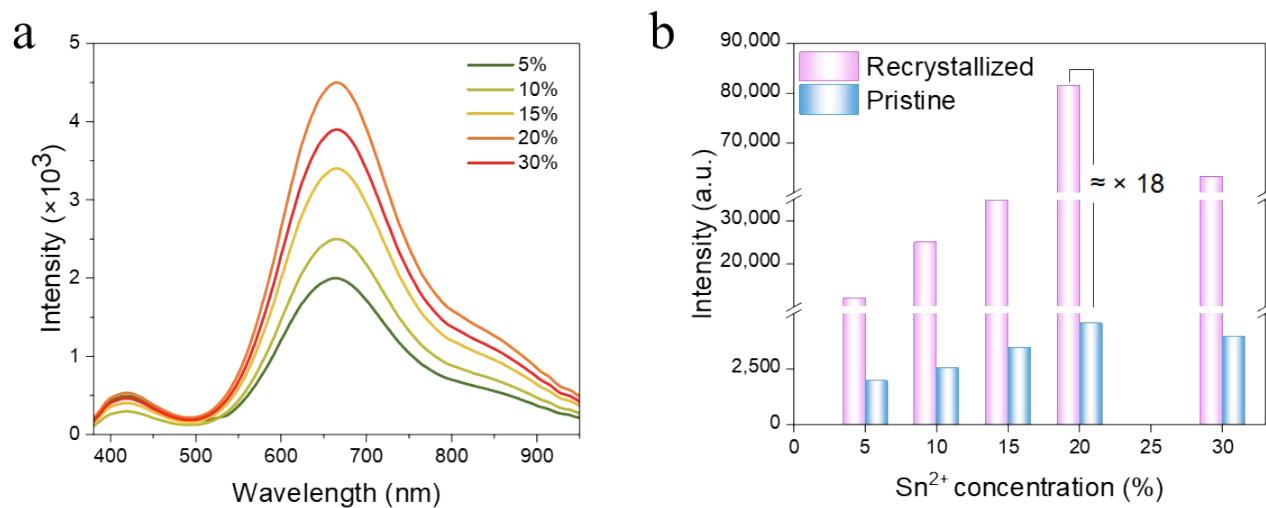

**Fig. S8. (a)** PL spectra of  $(\text{TPA})_2\text{ZnBr}_4:x\%\text{Sn}^{2+}$  with different  $\text{Sn}^{2+}$  concentrations ( $\lambda_{\text{ex}} = 368 \text{ nm}$ ). **(b)** PL intensity of the pristine and recrystallized  $(\text{TPA})_2\text{ZnBr}_4: x\%\text{Sn}^{2+}$  with different  $\text{Sn}^{2+}$  concentrations.

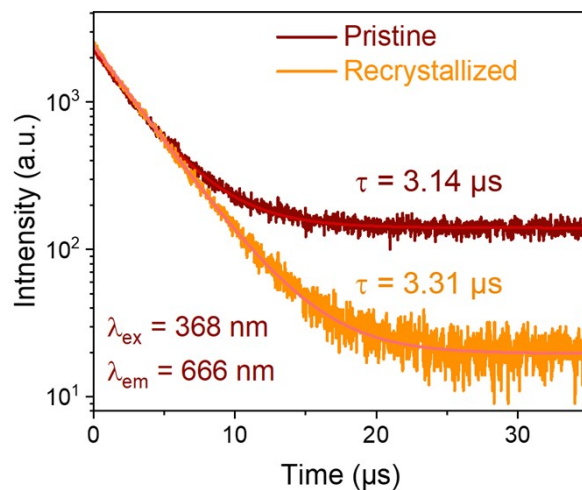

**Fig. S9.** PL decay curves obtained for the pristine and recrystallized  $(\text{TPA})_2\text{ZnBr}_4:20\%\text{Sn}^{2+}$ .

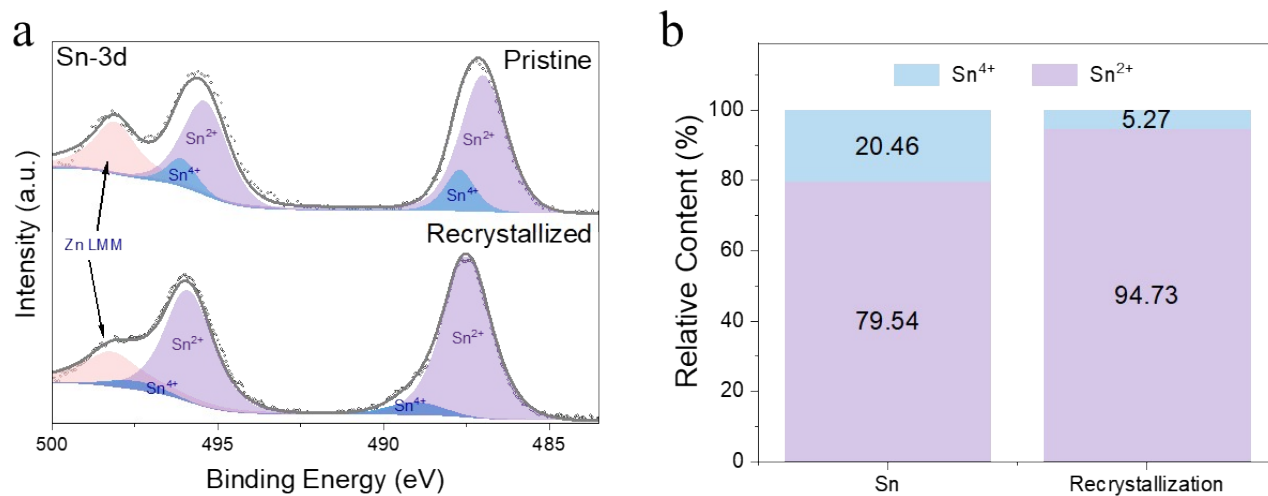

**Fig. S10. (a)** XPS of Sn 3d spectra. The first peak on the left (pink) is the satellite peak of Zn. **(b)** Proportion of Sn with different valences for the pristine and recrystallized  $(\text{TPA})_2\text{ZnBr}_4:20\%\text{Sn}^{2+}$ .

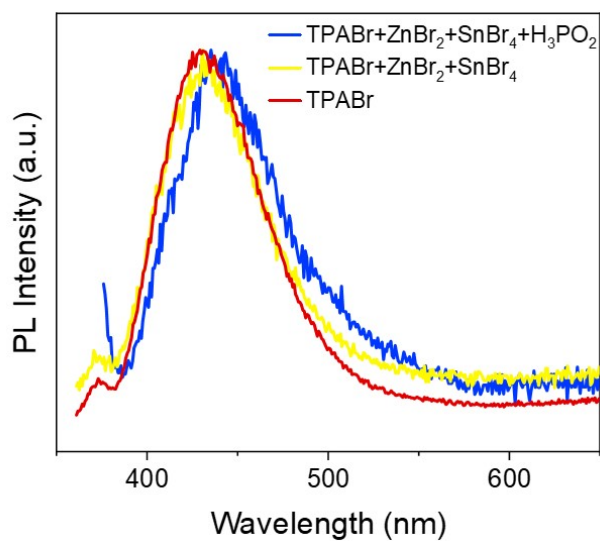

**Fig. S11.** PL spectra of TPABr and compounds synthesized used SnBr<sub>4</sub>.

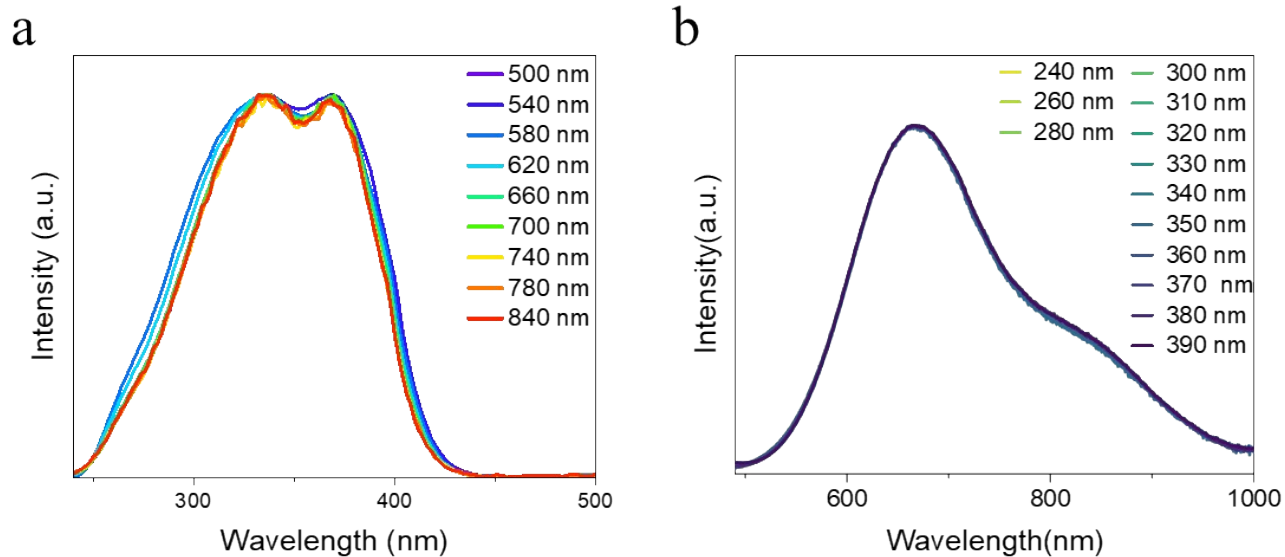

**Fig. S12. (a)** Emission wavelength-dependent PLE spectra, **(b)** Excitation wavelength-dependent PL spectra of recrystallized (TPA)<sub>2</sub>ZnBr<sub>4</sub>:20%Sn<sup>2+</sup> SCs at RT.



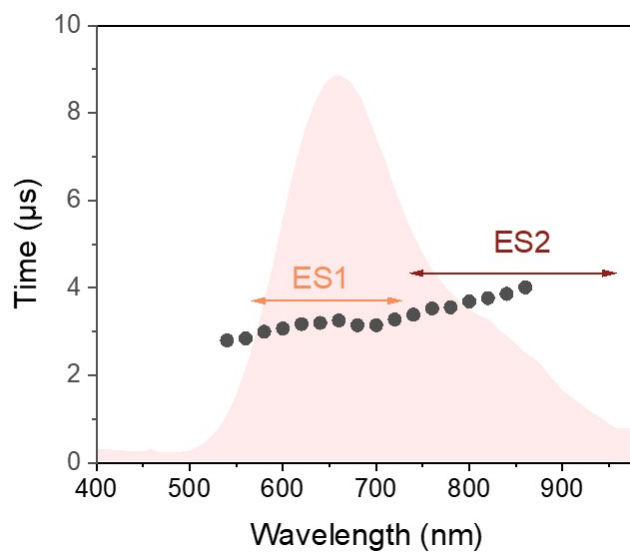

**Fig. S13.** PL lifetimes at the corresponding wavelengths of recrystallized  $(\text{TPA})_2\text{ZnBr}_4:20\%\text{Sn}^{2+}$ .

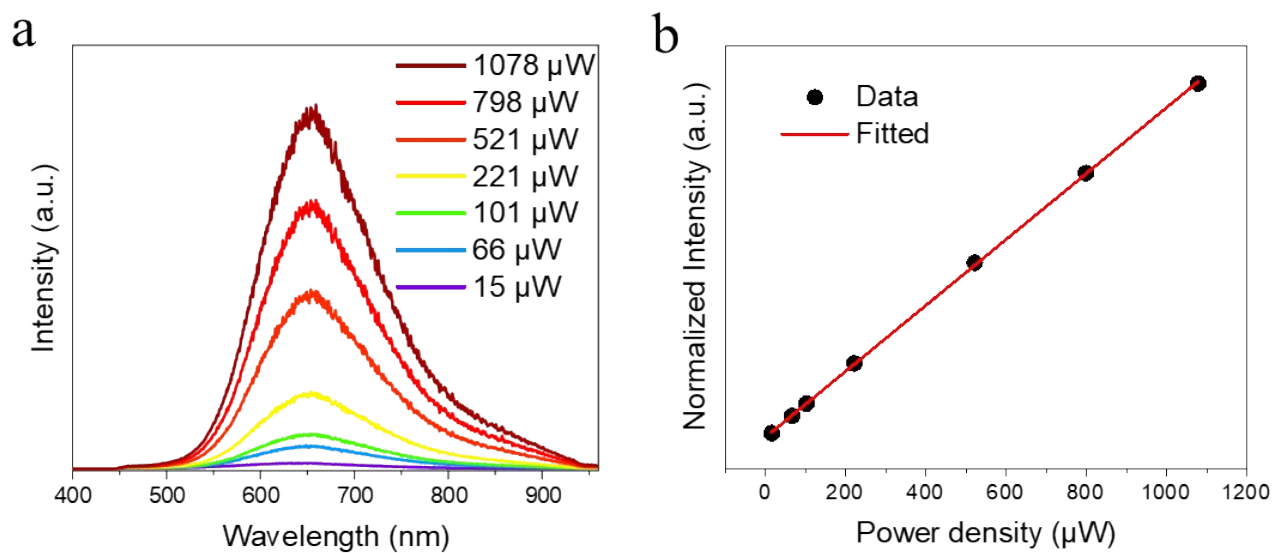

**Fig. S14. (a)** Excitation power-dependent PL spectra of recrystallized  $(\text{TPA})_2\text{ZnBr}_4:20\%\text{Sn}^{2+}$  under 405 nm laser excitation. **(b)** Fitting results of PL intensity versus excitation power.

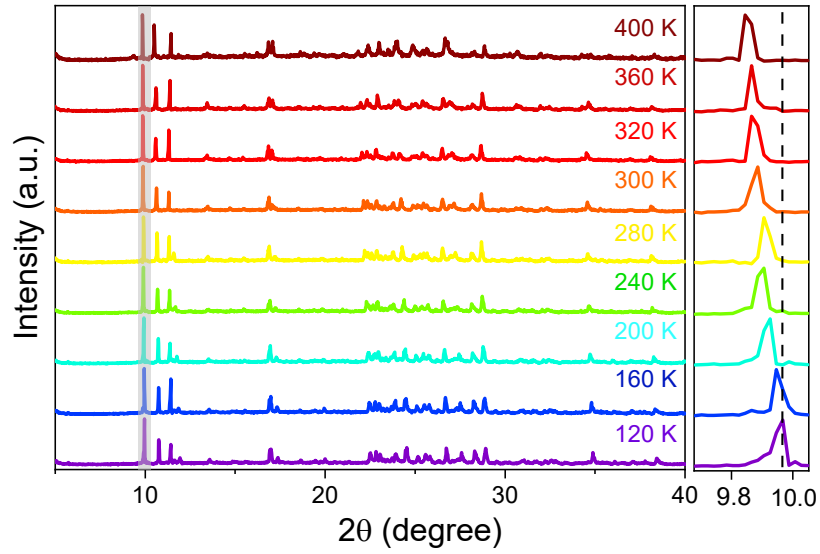

**Fig. S15.** Temperature-dependent XRD spectra of recrystallized  $(\text{TPA})_2\text{ZnBr}_4:20\%\text{Sn}^{2+}$ .

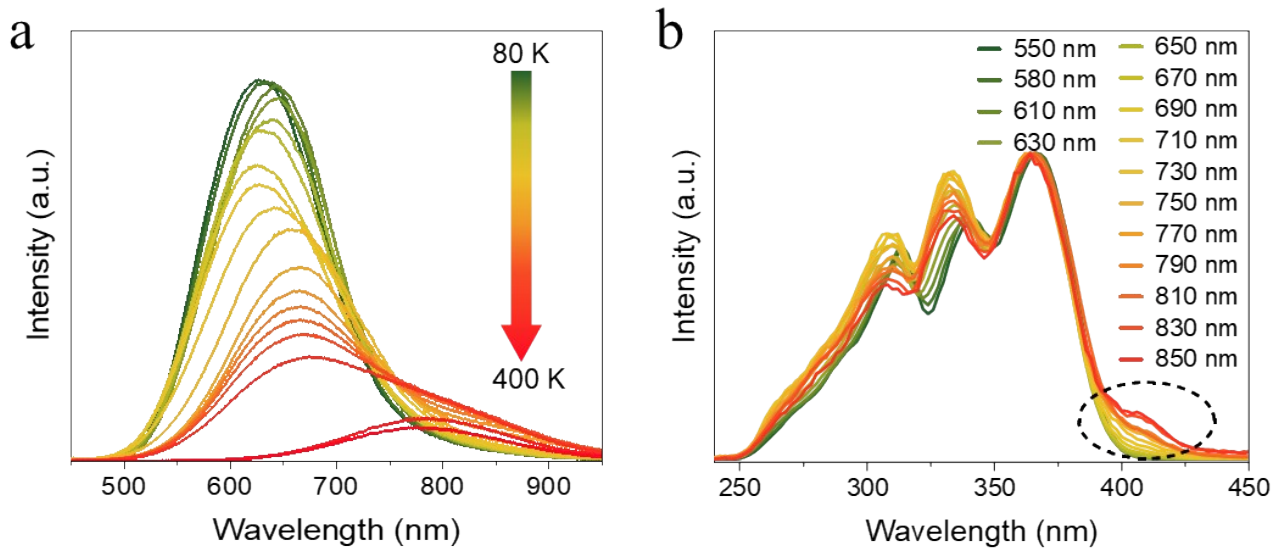

**Fig. S16.** (a) Temperature dependent PL spectra of recrystallized  $(\text{TPA})_2\text{ZnBr}_4:20\%\text{Sn}^{2+}$  intervals of 20 K at 368 nm excitation. (b) Emission wavelength-dependent PLE spectra of recrystallized  $(\text{TPA})_2\text{ZnBr}_4:20\%\text{Sn}^{2+}$  at 80 K.

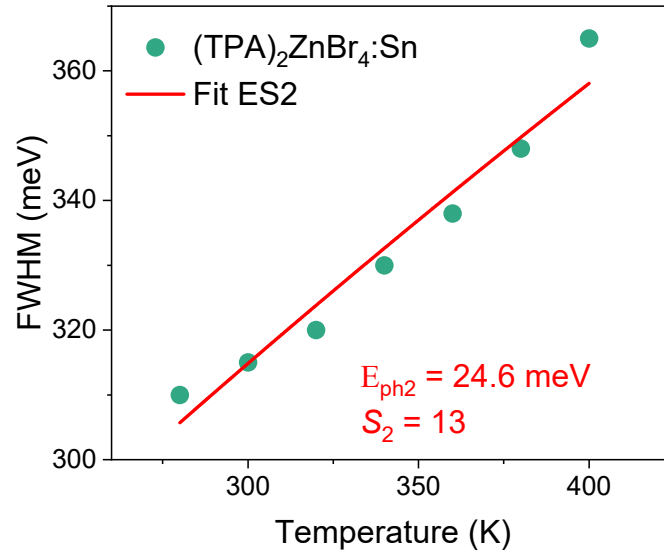

**Fig. S17.** The fitting result of the function that FWHM of ES2 versus the temperature.

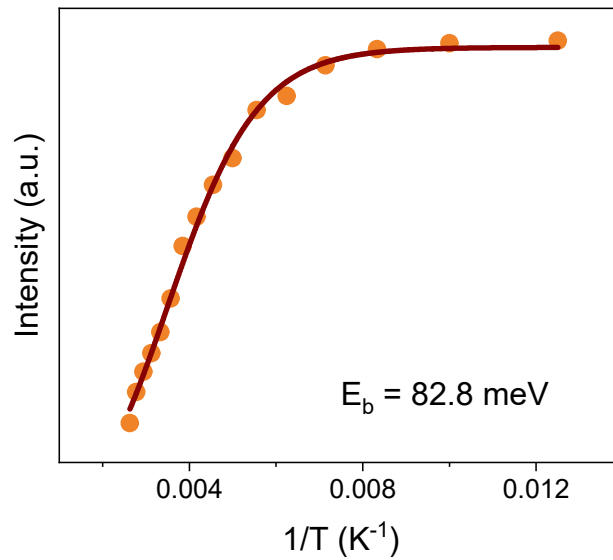

**Fig. S18.** The fitting result of the function that PL intensity versus the reciprocal of the temperature for (TPA)<sub>2</sub>ZnBr<sub>4</sub>:20%Sn<sup>2+</sup>.

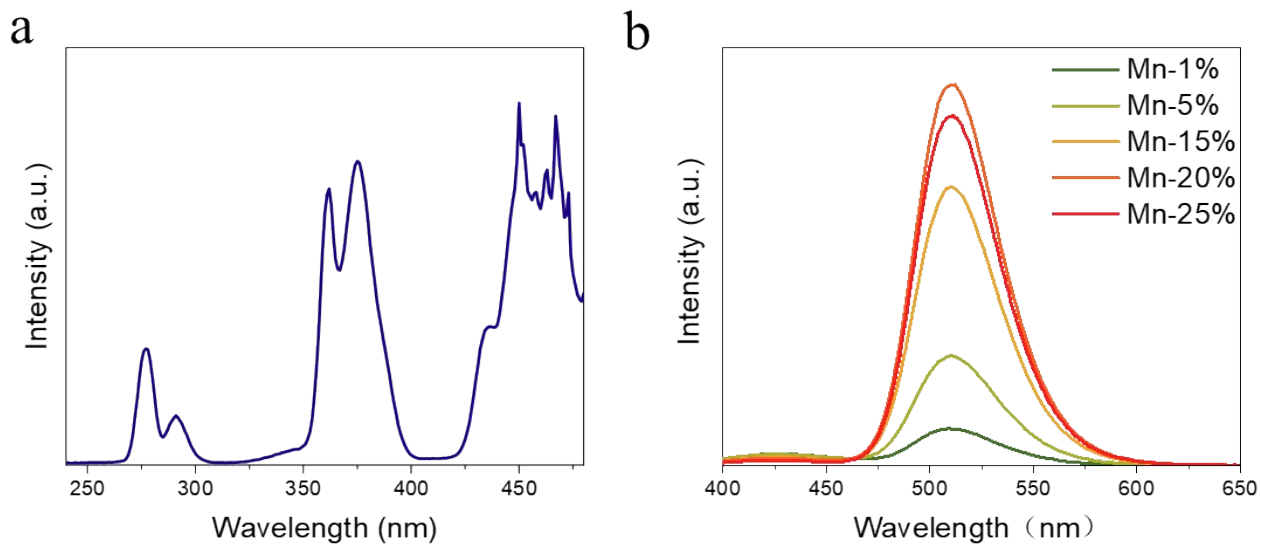

**Fig. S19.** (a) PLE spectra of  $(\text{TPA})_2\text{ZnBr}_4:\text{Mn}^{2+}$ . (b) PL spectra ( $\lambda_{\text{ex}} = 368 \text{ nm}$ ) of  $(\text{TPA})_2\text{ZnBr}_4:x\%\text{Mn}^{2+}$  with different  $\text{Mn}^{2+}$  concentrations.

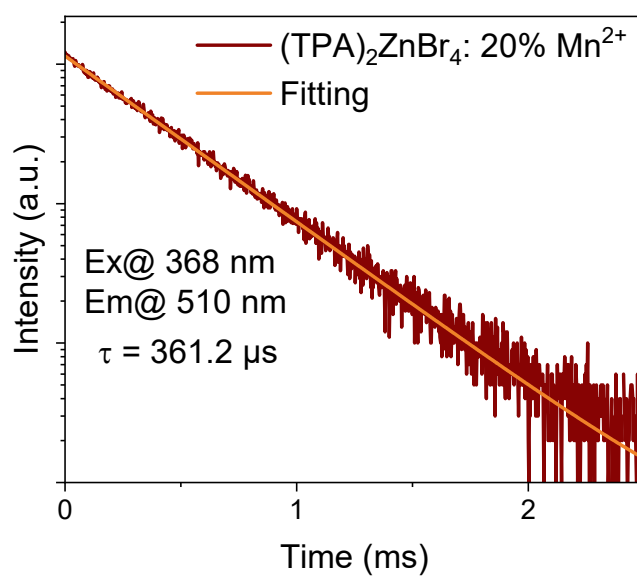

**Fig. S20.** PL decay curves of  $(\text{TPA})_2\text{ZnBr}_4:20\%\text{Mn}^{2+}$  ( $\lambda_{\text{ex}} = 368 \text{ nm}$ ,  $\lambda_{\text{em}} = 510 \text{ nm}$ ).

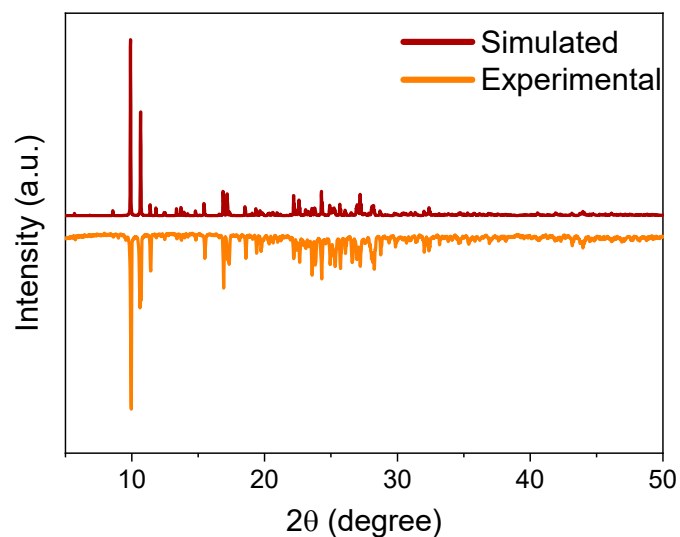

**Fig. S21.** Experimental and simulated PXRD patterns of  $(\text{TPA})_2\text{ZnBr}_4:5\%\text{Sn}^{2+}/20\%\text{Mn}^{2+}$ .

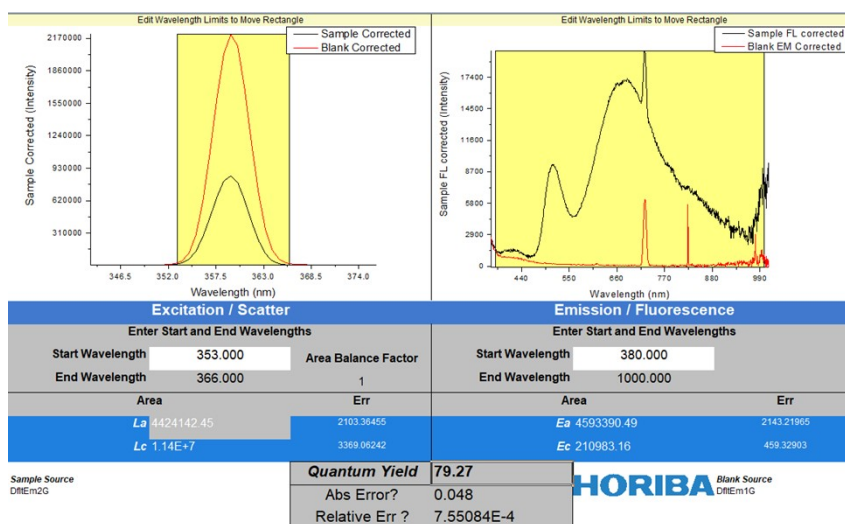

**Fig. S22.** The maximum PLQY of  $(\text{TPA})_2\text{ZnBr}_4: x\%\text{Sn}^{2+}/20\%\text{Mn}^{2+}$  SCs.

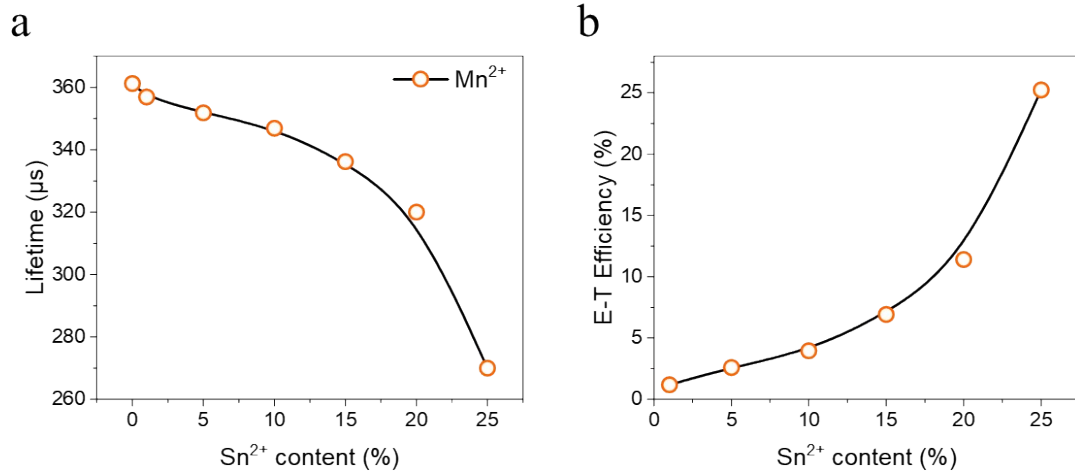

**Fig. S23. (a)** Lifetime of Mn<sup>2+</sup> in (TPA)<sub>2</sub>ZnBr<sub>4</sub>:x%Sn<sup>2+</sup>/20%Mn<sup>2+</sup> ( $\lambda_{\text{ex}} = 368 \text{ nm}$ ,  $\lambda_{\text{em}} = 510 \text{ nm}$ ). **(b)** Energy transfer efficiency of (TPA)<sub>2</sub>ZnBr<sub>4</sub>:x%Sn<sup>2+</sup>/20%Mn<sup>2+</sup>.<sup>2</sup>

$$\eta_{ET} = 1 - \frac{\tau_x}{\tau_0}$$

where  $\tau_0$  is the decay lifetime of STE in (TPA)<sub>2</sub>ZnBr<sub>4</sub>:20% Mn<sup>2+</sup>,  $\tau_x$  is the decay lifetime of STE in (TPA)<sub>2</sub>ZnBr<sub>4</sub>:x%Sn<sup>2+</sup>/20%Mn<sup>2+</sup> with various Sn<sup>2+</sup> concentrations.

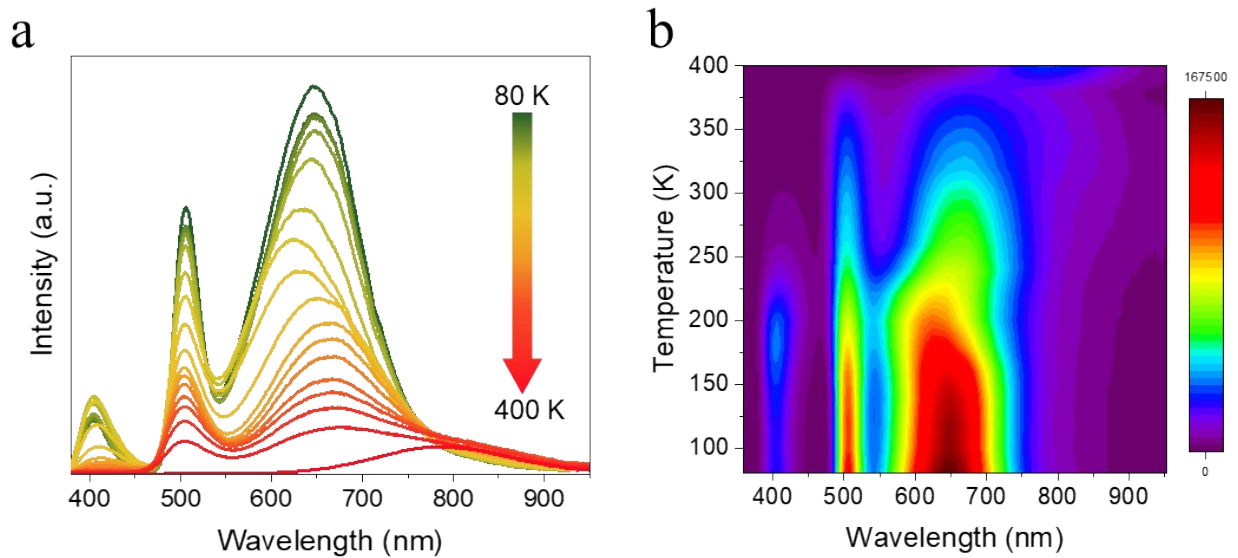

**Fig. S24. (a)** Temperature-dependent PL spectra of (TPA)<sub>2</sub>ZnBr<sub>4</sub>:10%Sn<sup>2+</sup>/20%Mn<sup>2+</sup> excited at 368 nm and corresponding pseudo-color mapping **(b)**.

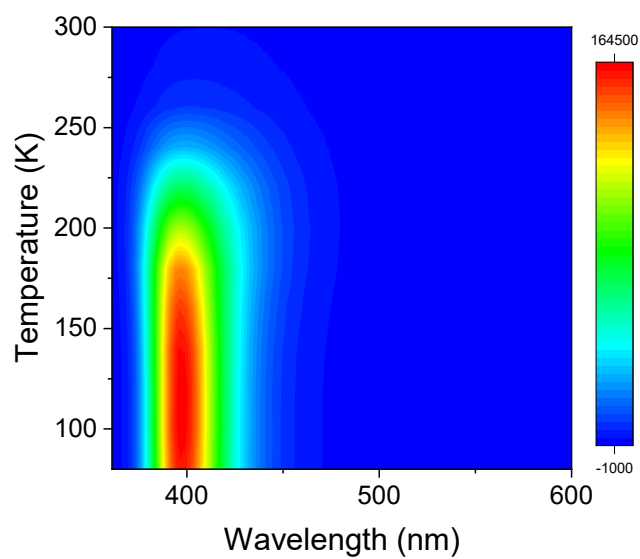

**Fig. S25.** Temperature-dependent PL spectra of pure  $(\text{TPA})_2\text{ZnBr}_4$  excited at 368 nm.

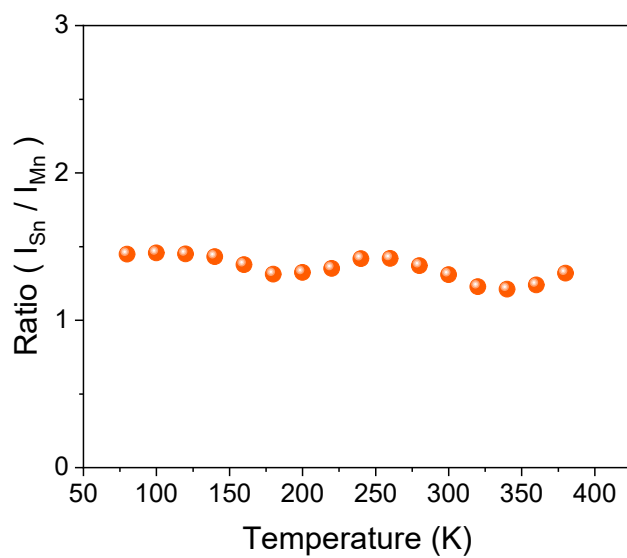

**Fig. S26.** PL intensity ratio of  $\text{Sn}^{2+}$  to  $\text{Mn}^{2+}$  in  $(\text{TPA})_2\text{ZnBr}_4:10\%\text{Sn}^{2+}/20\%\text{Mn}^{2+}$  as a function of temperature.

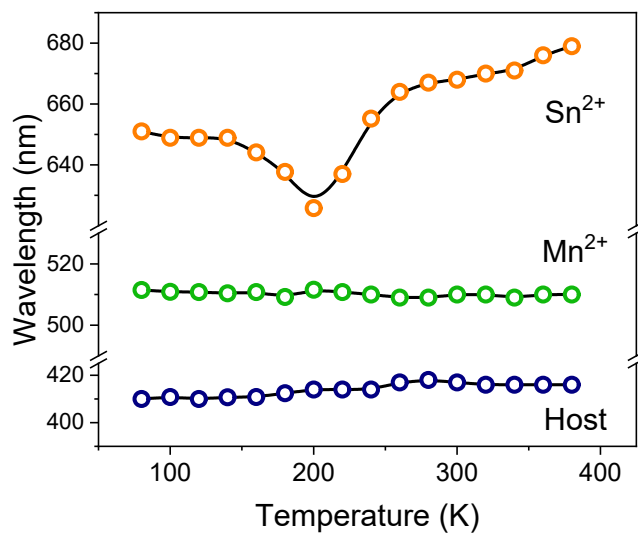

**Fig. S27.** PL peak position of  $(\text{TPA})_2\text{ZnBr}_4:10\%\text{Sn}^{2+}/20\%\text{Mn}^{2+}$  under various temperature.

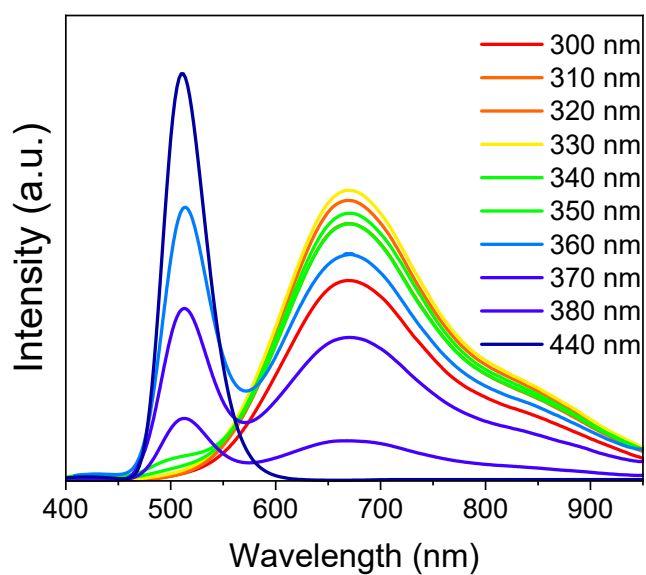

**Fig. S28.** Excitation wavelength-dependent PL spectra of  $(\text{TPA})_2\text{ZnBr}_4:5\%\text{Sn}^{2+}/20\%\text{Mn}^{2+}\text{SCs}$ .



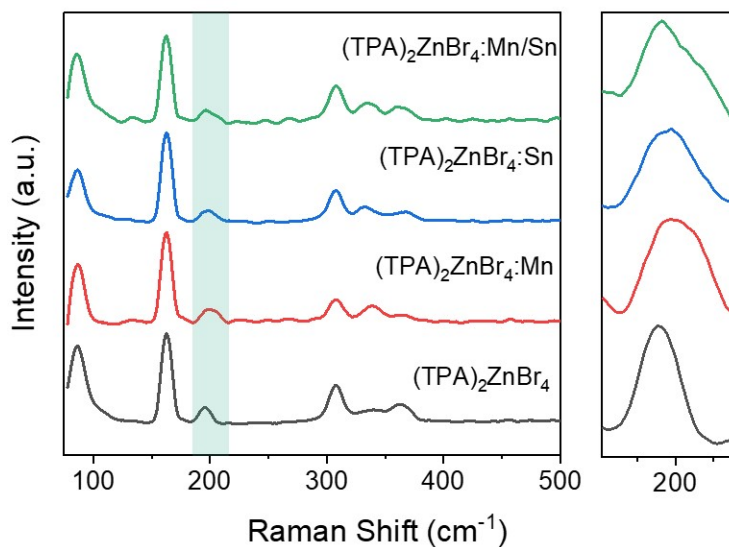

**Fig. S29.** Raman spectra of pure, Mn<sup>2+</sup>-doped, Sn<sup>2+</sup>-doped, and Mn<sup>2+</sup>/Sn<sup>2+</sup>-codoped (TPA)<sub>2</sub>ZnBr<sub>4</sub>.

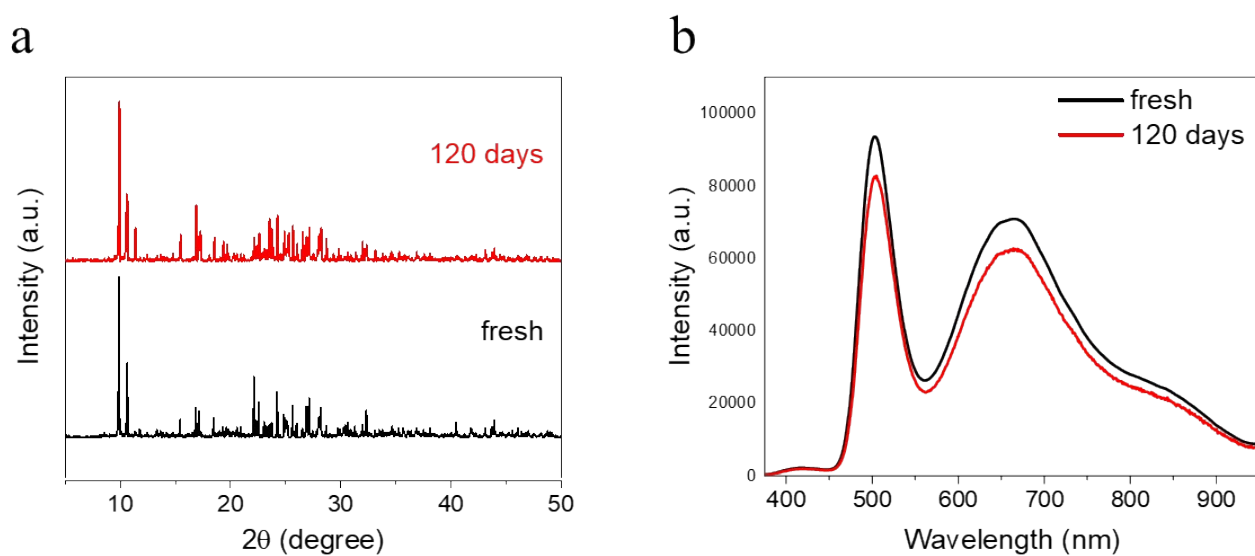

**Fig. S30.** XRD patterns (a) and PL spectra (b) of (TPA)<sub>2</sub>ZnBr<sub>4</sub>:5% Sn<sup>2+</sup>/20%Mn<sup>2+</sup> stored in atmospheric environment for 120 days.

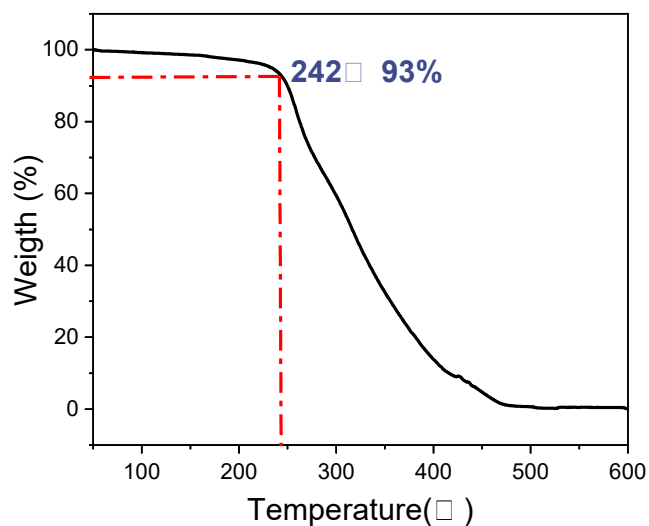

**Fig. S31.** TG curves of  $(\text{TPA})_2\text{ZnBr}_4:5\% \text{Sn}^{2+}/20\%\text{Mn}^{2+}$  powders.

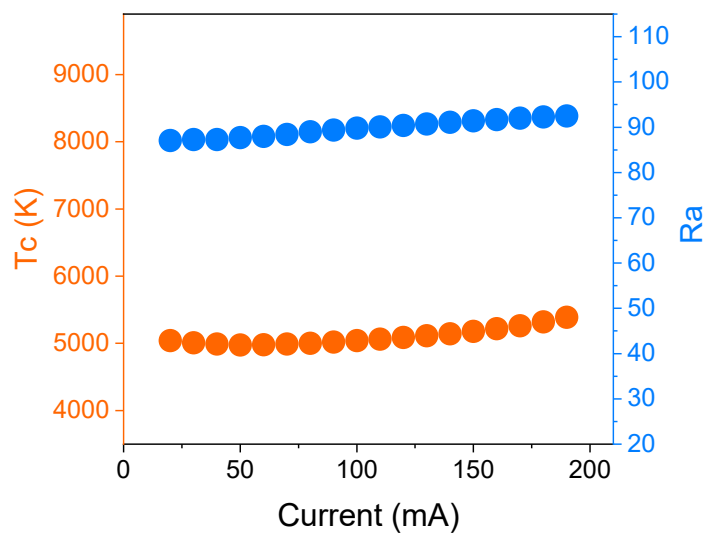

**Fig. S32.** CRI and CCT stability of the pc-LED device by mixing  $(\text{TPA})_2\text{ZnBr}_4:5\%\text{Sn}^{2+}/20\%\text{Mn}^{2+}$  powders with PMMA polymer at various operating currents.

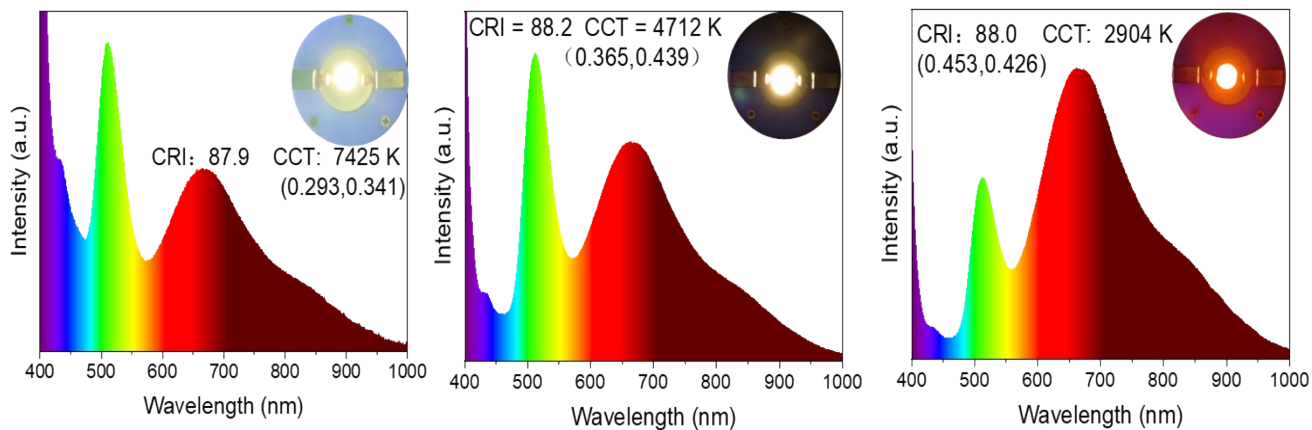

**Fig. S33.** EL spectra of  $(\text{TPA})_2\text{ZnBr}_4:x\%\text{Sn}^{2+}/20\%\text{Mn}^{2+}$  pc-LEDs at 60 mA drive current with various  $\text{Sn}^{2+}$  concentrations, the inset shows the optical photos of the operating pc-LEDs.

#### REFERENCES

- 1 R. Zhang, H. Xie, F. Wang, Q. Zhao, L. Meng, Z. Tang, B. Su and H. Liu, *Laser & Photonics Rev*, 2024, **18**, 2400450.
- 2 L. Cao, X. Jia, W. Gan, C.-G. Ma, J. Zhang, B. Lou and J. Wang, *Adv. Funct. Mater*, 2023, **33**, 2212135.
